# Supplementary material
Source: publisher figshare collection journal article supplement (https://acs.figshare.com/ndownloader/files/5185327)
Supplement: Supplementary file 1 [file 5185327]

# First Total Synthesis of *trans*- and *cis*-Resorcyclide: Remarkable Hydrogen-Bond-Controlled, Stereospecific Ring Closing Metathesis

Elias A. Couladouros,\* Anastasia P. Mihou and Emmanuel A. Bouzas

*Chemistry Laboratories, Agricultural University of Athens, Iera Odos 75, Athens, 118 55, Greece and Organic and Bioorganic Chemistry Laboratory, NCSR «Demokritos», 153 10 Ag. Paraskevi, Athens, Greece.*

*ecoula@chem.demokritos.gr*

## SUPPORTING INFORMATION

**General methods.** All reactions were carried out under anhydrous conditions and argon atmosphere using dry, freshly distilled solvents, unless otherwise noted. Tetrahydrofuran (THF) was distilled from sodium/benzophenone and dichloromethane ( $\text{CH}_2\text{Cl}_2$ ) from CaH. Yields refer to chromatographically and spectroscopically ( $^1\text{H}$  NMR) homogeneous materials, unless otherwise stated. All reagents were purchased at highest commercial quality and used without further purification, unless otherwise stated. All reactions were monitored by thin-layer chromatography (TLC) carried out on 0.25 mm Merck silica gel plates (60 F<sub>254</sub>) using UV light as visualizing agent and ethanolic phosphomolybdic acid, *p*-anisaldehyde solution and heat as developing agents. Merck silica gel (60, particle size 0.040-0.063 mm) was used for flash column chromatography. NMR spectra were recorded on Bruker AMX-500 or AC-250 instruments. The following abbreviations were used to explain NMR signal multiplicities: s = singlet, d = doublet, q = quartet, m = multiplet, ddd = doublet of doublet of doublets, dt = doublet of triplets, br = broad. IR spectra were recorded on Nicolet Magna system 550 FT-IR instruments. Optical rotations were recorded on a Perkin-Elmer 241 polarimeter. High resolution mass spectra (HRMS) were recorded on a VG ZAB-ZSE mass spectrometer under fast atom bombardment (FAB) conditions and matrix-assisted (MALDI-FTMS) mass spectra were recorded on a PerSeptive Biosystems Voyager IonSpect mass spectrometer.

S2

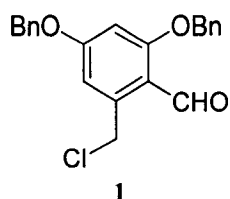

**Benzyl chloride (1):** Phosphorus oxychloride (6 mL, 65.7 mmol) was added drop-wise, over 10 min period, to DMF (10 mL, 124.8 mmol) under argon, at 0 °C. The ice-bath was removed and the solution was further stirred vigorously for 20 min. A solution of 3,5-dibenzoyloxybenzyl alcohol (5.00 g, 15.6 mmol) in DMF (2 mL) was then added via cannula and the reaction mixture was heated to 90 °C for 3 h. Upon completion it was allowed to cool to ambient temperature and ice-water (150 mL) was added. The pH was neutralized by addition of an aqueous solution of NaOH (2*N*; 100 mL) and the mixture was further stirred for 1.5 h at 25 °C. The resulting precipitate was filtered, washed with cool water (3 x 25 mL) and dried under reduced pressure to afford **1** as white solid (5.14 g, 90%).

$R_f$  = 0.35 (Hexanes / AcOEt 8:2); FTIR (neat):  $\tilde{\nu}$  = 3090, 3069, 3035, 1676, 1600, 1575, 1440, 1323, 1154, 739, 681 cm<sup>-1</sup>; <sup>1</sup>H NMR (250 MHz, CDCl<sub>3</sub>, 25 °C):  $\delta$  = 10.55 (s, 1H; CH=O), 7.45 – 7.34 (m, 10H; OCH<sub>2</sub>ArH), 6.88 (d,  $J$  = 2.2 Hz, 1H; ArH), 6.59 (d,  $J$  = 2.2 Hz, 1H; ArH), 5.13 (s, 4H; OCH<sub>2</sub>Ph), 5.07 (s, 2H; CH<sub>2</sub>Cl); <sup>13</sup>C NMR (62.9 MHz, CDCl<sub>3</sub>, 25 °C):  $\delta$  = 190.0, 164.0, 161.8, 142.8, 135.5, 128.5, 127.3, 127.2, 116.0, 108.8, 99.2, 70.8, 70.3, 45.0.

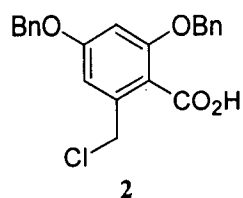

**Benzoic acid (2):** To a stirred solution of benzaldehyde **1** (1.70 g, 4.63 mmol) in acetone / DMSO (50 mL : 20mL) was added an aqueous solution of sulfamic acid (765 mg, 7.88 mmol in 15 mL of water). The mixture was cooled to 0 °C and then an aqueous solution of sodium chlorite (810 mg, 7.17 mmol in 35 mL of water) was slowly added. The reaction mixture was stirred at 0 °C for 30 min and after completion, was extracted with ethyl acetate (3 x 50 mL). The combined organic

S3

layers were washed with water (2 x 30 mL) and brine (30 mL), dried over anhydrous  $\text{Na}_2\text{SO}_4$  and concentrated under reduced pressure to afford **2** as white solid (1.68 g, 95%), which was used in the next step without any further purification.

$R_f$  = 0.35 (Hexanes / AcOEt / AcOH 7:3:0.1); FTIR (KBr):  $\tilde{\nu}$  = 3524, 3443, 3295, 3029, 2886, 2675, 2575, 1689, 1603, 1310, 1171, 1046, 828, 738, 701  $\text{cm}^{-1}$ ;  $^1\text{H}$  NMR (250 MHz,  $\text{CDCl}_3$ , 25  $^\circ\text{C}$ ):  $\delta$  = 7.45 – 7.34 (m, 10H;  $\text{OCH}_2\text{ArH}$ ), 6.92 (d,  $J$  = 2.2 Hz, 1H;  $\text{ArH}$ ), 6.64 (d,  $J$  = 2.2 Hz, 1H;  $\text{ArH}$ ), 5.16 (s, 2H;  $\text{OCH}_2\text{Ph}$ ), 5.10 (s, 2H;  $\text{OCH}_2\text{Ph}$ ), 4.97 (s, 2H;  $\text{CH}_2\text{Cl}$ );  $^{13}\text{C}$  NMR (62.9 MHz,  $\text{CDCl}_3$ , 25  $^\circ\text{C}$ ):  $\delta$  = 167.8, 161.8, 158.8, 142.1, 135.7, 134.9, 128.8, 128.7, 128.6, 128.4, 127.6, 127.4, 112.2, 109.5, 100.8, 71.9, 70.4, 44.9; HRMS (MALDI – FTMS) calcd for  $\text{C}_{22}\text{H}_{19}\text{ClO}_4$  ( $[\text{M}+\text{Na}]^+$ ): 405.0864; found 405.0869.

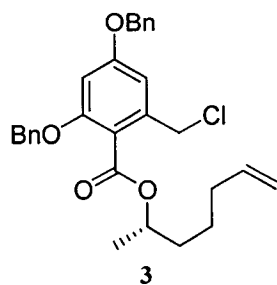

**Ester (3):** A solution of DIAD (0.095 mL, 0.46 mmol) in benzene (0.2 mL) was treated with  $\text{P}(2\text{-furyl})_3$  (110 mg, 0.46 mmol) under argon and stirred at 25  $^\circ\text{C}$  for 5 min. A solution of (*R*)-Hept-6-enol<sup>[1]</sup> (40 mg, 0.35 mmol) in benzene (0.7 mL) was then added and the mixture was stirred for 5 min. Benzoic acid **2** was added and the reaction mixture was stirred for further 10 min. The solvent was removed *in vacuo* and the residue was subjected to flash chromatography ( $\text{SiO}_2$ , Hexanes / AcOEt 98:2) to afford **3** as colorless oil (122 mg, 73%).

$R_f$  = 0.45 (Hexanes / AcOEt 9:1);  $[\alpha]_D^{25}$  = + 17.4 ( $c$  = 1.39 in  $\text{CHCl}_3$ ); FTIR (neat):  $\tilde{\nu}$  = 3068, 3035, 2977, 2936, 2868, 1713, 1605, 1456, 1436, 1377, 1331, 1287, 1168, 1038, 910, 836, 737, 699  $\text{cm}^{-1}$ ;  $^1\text{H}$  NMR (250 MHz,  $\text{CDCl}_3$ , 25  $^\circ\text{C}$ ):  $\delta$  = 7.44

<sup>1</sup> Lee, C. W.; Crubbs, R. H. *J. Org. Chem.* **2001**, *66*, 7155–7158.

S4

– 7.32 (m, 10H; OCH<sub>2</sub>ArH), 6.66 (d, *J* = 2.2 Hz, 1H; ArH), 6.55 (d, *J* = 2.2 Hz, 1H; ArH), 5.73 (ddt, *J* = 16.7, 10.4, 6.3 Hz, 1H; CH=CH<sub>2</sub>), 5.25 – 5.10 (m, 1H; CHCH<sub>3</sub>), 5.05 (s, 2H; OCH<sub>2</sub>Ph), 5.04 (s, 2H; OCH<sub>2</sub>Ph), 5.02 – 4.88 (m, 2H; CH=CH<sub>2</sub>), 4.61 (s, 2H; CH<sub>2</sub>Cl), 2.07 – 1.92 (m, 2H; CH<sub>2</sub>CH=CH<sub>2</sub>), 1.76 – 1.34 (m, 4H; CH<sub>2</sub>CH<sub>2</sub>), 1.25 (d, *J* = 6.3 Hz, 3H; CH<sub>3</sub>); <sup>13</sup>C NMR (62.9 MHz, CDCl<sub>3</sub>, 25 °C): δ = 166.7, 160.6, 157.5, 138.5, 137.5, 128.7, 128.5, 128.2, 128.0, 127.5, 127.4, 117.2, 114.6, 107.5, 100.9, 72.3, 70.7, 70.3, 43.5, 35.3, 33.4, 24.6, 19.8; HRMS (MALDI – FTMS) calcd for C<sub>29</sub>H<sub>31</sub>ClO<sub>4</sub> ([M+Na]<sup>+</sup>): 501.1803; found 501.1816.

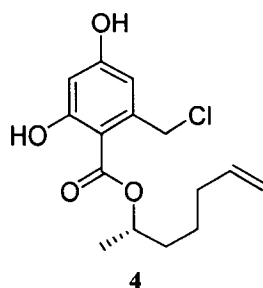

**Resorcynol (4):** To a solution of dibenzyl ether **3** (62.5 mg, 0.13 mmol) in DCM (3 mL) was added thioanisole (0.2 mL) under argon and the mixture was cooled to -78 °C. A solution of BBr<sub>3</sub> (1M; 0.29 mL), was then added drop-wise over 15 min period. The reaction was quenched with MeOH (0.1 mL) and an aqueous solution of HCl (1N, 2 mL) was added. The crude mixture was extracted with AcOEt (2 x 5 mL) and the combined organic layers were washed with water (2 mL) and brine (2 mL), dried over anhydrous Na<sub>2</sub>SO<sub>4</sub> and concentrated under reduced pressure. The crude product was purified by flash column chromatography (SiO<sub>2</sub>, Hexane / EtOAc 93:7) to afford **4** as colorless oil (33 mg, 85%).

*R*<sub>f</sub> = 0.35 (Hexanes / AcOEt 8:2); [*α*]<sub>D</sub><sup>25</sup> = + 42.3 (*c* = 2.29 in CHCl<sub>3</sub>); FTIR (neat):

$\tilde{\nu}$  = 3386, 3078, 2980, 2936, 2864, 1652, 1620, 1454, 1359, 1319, 1264, 1170, 1117, 914, 852, 729, 643 cm<sup>-1</sup>; <sup>1</sup>H NMR (250 MHz, CDCl<sub>3</sub>, 25 °C): δ = 12.00 (s, 1H; OH), 6.51 (d, *J* = 2.2 Hz, 1H; ArH), 6.41 (d, *J* = 2.2 Hz, 1H; ArH), 5.79 (ddt, *J* = 16.7, 10.1, 6.7 Hz, 1H; CH=CH<sub>2</sub>), 5.35 – 5.20 (m, 1H; CHCH<sub>3</sub>), 5.08 – 4.93 (m, 2H; CH=CH<sub>2</sub>), 4.83 (AB<sub>q</sub>, *J* = 11.3 Hz, 2H; CH<sub>2</sub>Cl), 2.16 – 2.04 (m, 2H;

S5

$\text{CH}_2\text{CH}=\text{CH}_2$ ), 1.92 – 1.44 (m, 4H;  $\text{CH}_2\text{CH}_2$ ), 1.41 (d,  $J = 6.3$  Hz, 3H;  $\text{CH}_3$ );  $^{13}\text{C}$  NMR (62.9 MHz,  $\text{CDCl}_3$ , 25 °C):  $\delta = 170.2, 165.5, 160.5, 141.5, 138.2, 115.0, 111.6, 104.7, 103.9, 73.5, 46.2, 35.2, 33.4, 24.7, 19.8$ ; ESI – MS calcd for  $\text{C}_{15}\text{H}_{19}\text{ClO}_4$  ( $[\text{M}+\text{Na}]^+$ ): 321.0864; found 321.1.

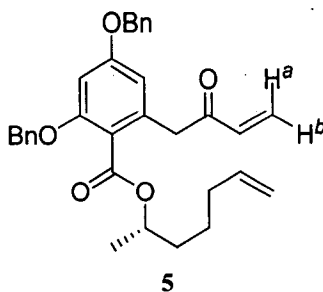

**Enone (5):** To a solution of benzyl chloride **3** (122 mg, 0.25 mmol) in HMPA (1 mL) that was previously bubbled with CO for 10 min,  $\text{Pd}(\text{PPh}_3)_4$  (14.9 mg, 13  $\mu\text{mol}$ ) and  $\text{P}(2\text{-furyl})_3$  (6.0 mg, 25  $\mu\text{mol}$ ) were sequentially added and the mixture was stirred for 5 min, at 25 °C under CO atmosphere. Tributyl(vinyl)tin (80  $\mu\text{L}$ , 0.27 mmol) was then added and the reaction was heated at 80 °C for 2 h, after which time Pd black precipitated. After extraction of the crude mixture with  $\text{Et}_2\text{O}$  (2 x 5 mL), the combined organic layers were washed with water (3 x 2 mL) and brine (2 mL), dried over anhydrous  $\text{Na}_2\text{SO}_4$  and concentrated under reduced pressure. The crude product was purified by flash column chromatography ( $\text{SiO}_2$ , Hexane / EtOAc 9:1) to afford **5** as colorless oil (60 mg, 47%) along with recovered **3** (32 mg, 26%).

$R_f = 0.40$  (Hexanes / AcOEt 8:2);  $[\alpha]_D^{25} = +10.8$  ( $c = 1.55$  in  $\text{CHCl}_3$ ); FTIR (neat):

$\tilde{\nu} = 3066, 3033, 2930, 2857, 1711, 1604, 1457, 1436, 1380, 1276, 1165, 1074, 1041, 913, 830, 739, 698 \text{ cm}^{-1}$ ;  $^1\text{H}$  NMR (250 MHz,  $\text{CDCl}_3$ , 25 °C):  $\delta = 7.44 - 7.31$  (m, 10H;  $\text{OCH}_2\text{ArH}$ ), 6.53 (d,  $J = 2.2$  Hz, 1H;  $\text{ArH}$ ), 6.43 (dd,  $J = 17.5, 10.0$  Hz, 1H;  $\text{C}(=\text{O})\text{CH}=\text{CH}_a\text{H}$ ), 6.40 (d,  $J = 2.2$  Hz, 1H;  $\text{ArH}$ ), 6.29 (dd,  $J = 17.5, 1.9$  Hz, 1H;  $\text{C}(=\text{O})\text{CH}=\text{CH}_b\text{H}$ ), 5.79 (dd,  $J = 10.0, 1.9$  Hz, 1H;  $\text{C}(=\text{O})\text{CH}=\text{CH}_2$ ), 5.71 (ddt,  $J = 16.7, 10.1, 6.7$  Hz, 1H;  $\text{CH}_2\text{CH}=\text{CH}_2$ ), 5.15 – 5.00 (m, 1H;  $\text{CHCH}_3$ ), 5.03 (s, 2H;  $\text{OCH}_2\text{Ph}$ ), 5.02 (s, 2H;  $\text{OCH}_2\text{Ph}$ ), 5.00 – 4.87 (m, 2H;  $\text{CH}_2\text{CH}=\text{CH}_2$ ), 3.90 (s, 2H;  $\text{CH}_2\text{C}(=\text{O})$ ), 2.04 – 1.89 (m, 2H;  $\text{CH}_2\text{CH}=\text{CH}_2$ ), 1.71 – 1.25 (m, 4H;  $\text{CH}_2\text{CH}_2$ ),

S6

1.19 (d,  $J = 6.3$  Hz, 3H;  $\text{CH}_3$ );  $^{13}\text{C}$  NMR (62.9 MHz,  $\text{CDCl}_3$ , 25 °C):  $\delta = 196.6$ , 167.5, 160.5, 157.7, 138.5, 136.3, 135.3, 128.9, 128.6, 128.4, 128.1, 128.0, 127.5, 127.5, 117.8, 114.6, 108.2, 99.7, 72.0, 70.6, 70.1, 45.2, 35.3, 33.4, 24.6, 19.8; HRMS (MALDI – FTMS) calcd for  $\text{C}_{32}\text{H}_{34}\text{O}_5$  ( $[\text{M}+\text{Na}]^+$ ): 521.2298; found 521.2315.

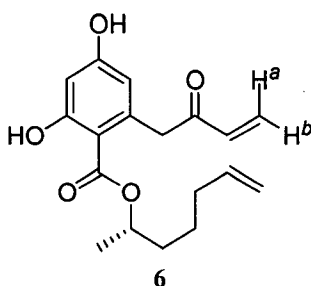

**Enone (6):** To a solution of benzyl chloride **4** (33 mg, 0.1105 mmol) in HMPA (0.5 mL) that was previously bubbled with CO for 10 min,  $\text{Pd}(\text{PPh}_3)_4$  (6.4 mg, 5.5  $\mu\text{mol}$ ) and  $\text{P}(2\text{-furyl})_3$  (2.6 mg, 11.2  $\mu\text{mol}$ ) were sequentially added and the mixture was stirred for 5 min, at 25 °C under CO atmosphere. Tributyl(vinyl)tin (35  $\mu\text{L}$ , 0.1215 mmol) was then added and the reaction was heated at 80 °C for 1.5 h, after which time Pd black precipitated. After extraction of the crude mixture with  $\text{Et}_2\text{O}$  (2 x 3 mL), the combined organic layers were washed with water (3 x 1.5 mL) and brine (1.5 mL), dried over anhydrous  $\text{Na}_2\text{SO}_4$  and concentrated under reduced pressure. The crude product was purified by flash column chromatography ( $\text{SiO}_2$ , Hexane / AcOEt 83:17) to afford **6** as colorless oil (26 mg, 74%).

$R_f = 0.30$  (Hexanes / AcOEt 7:3);  $[\alpha]_D^{25} = + 34.8$  ( $c = 1.89$  in  $\text{CHCl}_3$ ); FTIR (neat):

$\tilde{\nu} = 3367, 2981, 2934, 2862, 1696, 1653, 1617, 1456, 1399, 1318, 1264, 1173, 1109, 850, 805 \text{ cm}^{-1}$ ;  $^1\text{H}$  NMR (250 MHz,  $\text{CDCl}_3$ , 25 °C):  $\delta = 11.89$  (s, 1H, OH), 6.46 (dd,  $J = 17.5, 9.3$  Hz, 1H,  $\text{C}(=\text{O})\text{CH}=\text{CH}_a\text{H}$ ), 6.34 (dd,  $J = 17.5, 1.9$  Hz, 1H,  $\text{C}(=\text{O})\text{CH}=\text{CH}_b\text{H}$ ), 6.29 (d,  $J = 2.6$  Hz, 1H, ArH), 6.01 (d,  $J = 2.6$  Hz, 1H, ArH), 5.91 (dd,  $J = 9.7, 1.9$  Hz, 1H,  $\text{C}(=\text{O})\text{CH}=\text{CH}_2$ ), 5.76 (ddt,  $J = 16.7, 10.1, 6.7$  Hz, 1H,  $\text{CH}_2\text{CH}=\text{CH}_2$ ), 5.24 – 5.10 (m, 1H,  $\text{CHCH}_3$ ), 5.05 – 4.92 (m, 2H,  $\text{CH}_2\text{CH}=\text{CH}_2$ ), 4.14 (ABq,  $J = 17.9$  Hz, 2H,  $\text{CH}_2\text{C}(=\text{O})$ ), 2.10 – 1.98 (m, 2H,

S7

$\text{CH}_2\text{CH}=\text{CH}_2$ ), 1.72 – 1.29 (m, 4H,  $\text{CH}_2\text{CH}_2$ ), 1.22 (d,  $J = 6.3$  Hz, 3H,  $\text{CH}_3$ );  $^{13}\text{C}$  NMR (62.9 MHz,  $\text{CDCl}_3$ , 25 °C):  $\delta = 198.2, 170.3, 165.5, 161.0, 138.3, 138.1, 135.5, 129.2, 115.0, 113.1, 105.7, 103.1, 72.8, 48.7, 35.2, 33.3, 24.8, 19.9$ ; HRMS (MALDI – FTMS) calcd for  $\text{C}_{18}\text{H}_{22}\text{O}_5$  ( $[\text{M}+\text{Na}]^+$ ): 341.1359; found 341.1356.

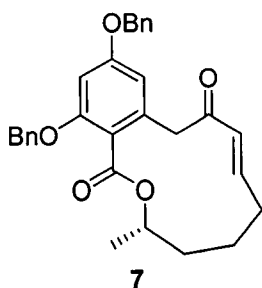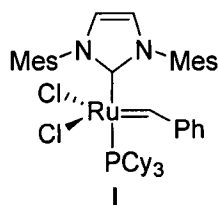

**Dibenzyl *trans*-Resorcylic diene (7):** To a solution of diene **5** (30 mg, 0.0602 mmol) in DCM (40 mL, dilution 1 mM), catalyst **I** (1.1 mg, 0.12  $\mu\text{mol}$ ) was added under argon and the mixture was heated to reflux. The reaction was quenched after 30 min by addition of ethylvinyl ether (50  $\mu\text{L}$ ) and concentrated under reduced pressure. The crude product was purified by flash column chromatography ( $\text{SiO}_2$ , Hexane / AcOEt 85:15) to afford **7** as white foam (18.8 mg, 67%).

$R_f = 0.20$  (Hexanes / AcOEt 8:2);  $[\alpha]_D^{25} = +37.6$  ( $c = 0.80$  in  $\text{CHCl}_3$ ); FTIR (neat):

$\tilde{\nu} = 3067, 3034, 2975, 2934, 2873, 1715, 1696, 1602, 1456, 1453, 1379, 1288, 1165, 1064, 740 \text{ cm}^{-1}$ ;  $^1\text{H}$  NMR (250 MHz,  $\text{CDCl}_3$ , 25 °C):  $\delta = 7.44 - 7.31$  (m, 10H;  $\text{OCH}_2\text{ArH}$ ), 6.91 (ddd,  $J = 16.0, 9.3, 5.6$  Hz, 1H;  $=\text{CHCH}_2$ ), 6.66 (d,  $J = 2.2$  Hz, 1H;  $\text{ArH}$ ), 6.49 (d,  $J = 2.2$  Hz, 1H;  $\text{ArH}$ ), 5.94 (dt,  $J = 16.4, 1.1$  Hz, 1H;  $\text{C(=O)CH=}$ ), 5.19 – 5.07 (m, 1H;  $\text{CHCH}_3$ ), 5.04 (s, 2H;  $\text{OCH}_2\text{Ph}$ ), 4.99 (s, 1H;  $\text{OCH}_2\text{Ph}$ ), 4.98 (s, 1H;  $\text{OCH}_2\text{Ph}$ ), 4.62 (d,  $J = 11.9$  Hz, 1H;  $\text{CH}_2\text{C(=O)}$ ), 3.30 (d,  $J = 11.9$  Hz, 1H;  $\text{CH}_2\text{C(=O)}$ ), 2.40 – 2.14 (m, 2H;  $\text{CH}_2\text{CH}=\text{CH}_2$ ), 1.92 – 1.57 (m, 4H;  $\text{CH}_2\text{CH}_2$ ), 1.12 (d,  $J = 6.3$  Hz, 3H;  $\text{CH}_3$ );  $^{13}\text{C}$  NMR (62.9 MHz,  $\text{CDCl}_3$ , 25 °C):  $\delta = 199.0, 160.6, 157.5, 150.1, 134.8, 130.9, 128.6, 128.4, 128.1, 128.0, 127.7, 117.9, 107.8, 99.7, 72.3, 70.6, 70.2, 42.8, 34.1, 31.3, 24.7, 20.2$ ; HRMS (MALDI – FTMS) calcd for  $\text{C}_{30}\text{H}_{30}\text{O}_5$  ( $[\text{M}+\text{H}]^+$ ): 471.2166; found 471.2177.

S8

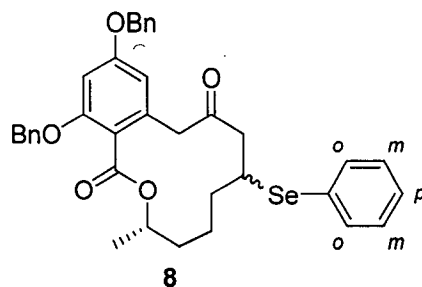

**Selenide (8):** To a stirred solution of diphenyl diselenide (29 mg, 0.1633 mmol) in EtOH (0.9 mL), NaBH<sub>4</sub> (21 mg, 0.5384 mmol) was added at 0 °C under argon. When the solution became colorless and clear (after 5 min), AcOH (40 µL, 0.6994 mmol) and a solution of enone **7** (19.0 mg, 0.0404 mmol) in THF (1.2 mL) were successively added and the reaction mixture was stirred for 10 min at room temperature. After extraction of the crude mixture with AcOEt (2 x 5 mL), the combined organic layers were washed with water (4 mL) and brine (3 mL), dried over anhydrous Na<sub>2</sub>SO<sub>4</sub> and concentrated under reduced pressure. The crude product was purified by flash column chromatography (SiO<sub>2</sub>, Hexane / AcOEt 9:1) to afford **8** as white foam (21.3 mg, 84%), (mixture of diastereoisomers, ratio 1:1).

$R_f$  = 0.40 (Hexanes / AcOEt 8:2); FTIR (neat):  $\tilde{\nu}$  = 3065, 3034, 2930, 2871, 1718, 1605, 1436, 1284, 1166, 1091, 1039, 739, 697 cm<sup>-1</sup>; <sup>1</sup>H NMR (250 MHz, CDCl<sub>3</sub>, 25 °C):  $\delta$  = 7.60 – 7.50 (m, 4H; SeArH<sub>o</sub>), 7.43 – 7.32 (m, 20H; OCH<sub>2</sub>ArH), 7.31 – 7.25 (m, 6H; SeArH<sub>m</sub>H<sub>p</sub>), 6.53 (d,  $J$  = 2.2 Hz, 2H; ArH), 6.38 (d,  $J$  = 2.2 Hz, 1H; ArH), 6.34 (d,  $J$  = 2.2 Hz, 1H; ArH), 5.31 – 5.09 (m, 2H; CHCH<sub>3</sub>), 5.05 – 4.99 (m, 8H; OCH<sub>2</sub>Ph), 4.11 (d,  $J$  = 17.9 Hz, 1H, CHHC(=O)), 4.09 (d,  $J$  = 16.9 Hz, 1H; CHHC(=O)), 4.00 – 3.85 (m, 1H; CHSePh), 4.81 – 3.65 (m, 1H; CHSePh), 3.52 (d,  $J$  = 17.9 Hz, 1H; CHHC(=O)), 3.47 (d,  $J$  = 16.9 Hz, 1H; CHHC(=O)), 3.03 – 2.53 (m, 4H; CH<sub>2</sub>CH<sub>2</sub>CHSePh), 1.90 – 1.46 (m, 8H; CH<sub>2</sub>CH<sub>2</sub>), 1.16 (d,  $J$  = 6.3 Hz, 3H, CH<sub>3</sub>), 1.14 (d,  $J$  = 6.3 Hz, 3H, CH<sub>3</sub>); <sup>13</sup>C NMR (62.9 MHz, CDCl<sub>3</sub>, 25 °C):  $\delta$  = 205.8, 205.6, 168.0, 167.5, 160.5, 160.3, 157.7, 156.9, 136.4, 136.3, 135.1, 133.9, 133.8, 133.2, 129.2, 128.6, 128.4, 128.2, 128.1, 127.9, 127.6, 127.5, 127.3, 118.3, 117.8, 113.1, 109.1, 99.9, 99.6, 73.5, 72.2, 71.7, 70.6, 70.4, 70.2, 48.8, 48.7, 48.2, 46.7, 38.6, 37.3, 34.2, 34.0, 32.9, 32.3, 29.7, 23.3, 20.9, 20.7,



S9

19.4; HRMS (ESI pos.) calcd for  $C_{36}H_{36}O_5Se$  ( $[M+H]^+$ ): 629.1806; found 629.1800.

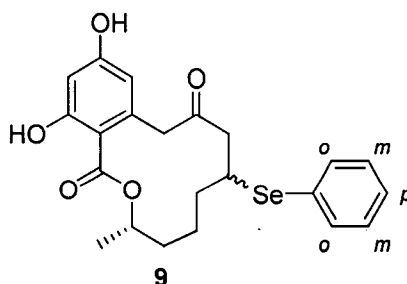

**Dihydroxy selenide (9):** To a solution of dibenzyl ether **8** (17.3 mg, 0.0276 mmol) in DCM (2 mL) was added thioanisole (50  $\mu$ L) under argon and the mixture was cooled to  $-78^\circ\text{C}$ . A solution of  $BBr_3$  (1M; 60  $\mu$ L) was added and the reaction mixture was stirred for 30 min. The reaction was quenched with MeOH (0.1 mL) and the crude mixture was extracted with AcOEt (2 x 3 mL). The combined organic layers were washed with water (2 mL) and brine (1.5 mL), dried over anhydrous  $Na_2SO_4$  and concentrated under reduced pressure. The crude product was purified by flash column chromatography ( $SiO_2$ , Hexane / AcOEt 8:2) to afford **9** as colorless oil (8.8 mg, 72%), (mixture of diastereoisomers (A or B), ratio 1:1).

$R_f$  = 0.25 (Hexanes / AcOEt 7:3); FTIR (neat):  $\tilde{\nu}$  = 3369, 2926, 2856, 1710, 1647, 1621, 1456, 1315, 1261, 1100, 743  $\text{cm}^{-1}$ ;  $^1\text{H}$  NMR (250 MHz,  $CDCl_3$ ,  $25^\circ\text{C}$ ):  $\delta$  = 12.02 (s, 1H; OH, (A)), 11.70 (s, 1H; OH, (B)), 7.64 – 7.57 (m, 2H; SeArH<sub>o</sub>, (B)), 7.57 – 7.50 (m, 2H; SeArH<sub>o</sub>, (A)), 7.39 – 7.30 (m, 6H; SeArH<sub>m</sub>H<sub>p</sub>, (A+B)), 6.31 (d,  $J$  = 2.6 Hz, 1H; ArH, (A or B)), 6.01 (d,  $J$  = 2.6 Hz, 1H; ArH, (A or B)), 5.32 – 5.18 (m, 1H; CHCH<sub>3</sub>, (A)), 5.06 – 4.90 (m, 1H; CHCH<sub>3</sub>, (B)), 4.73 (d,  $J$  = 18.2 Hz, 1H; CHHC(=O), (B)), 4.52 (d,  $J$  = 18.6 Hz, 1H; CHHC(=O), (A)), 4.20 – 3.99 (m, 1H; CHSePh, (A)), 3.95 – 3.79 (m, 1H; CHSePh, (B)), 3.66 (d,  $J$  = 18.6 Hz, 1H; CHHC(=O), (A)), 3.41 (d,  $J$  = 18.2 Hz, 1H; CHHC(=O), (B)), 3.05 – 2.58 (m, 4H; CH<sub>2</sub>CH<sub>2</sub>CHSePh, (A+B)), 1.88 – 1.40 (m, 8H; CH<sub>2</sub>CH<sub>2</sub>, (A+B)), 1.33 (d,  $J$  = 6.0 Hz, 3H; CH<sub>3</sub>, (B)), 1.27 (d,  $J$  = 6.0 Hz, 3H; CH<sub>3</sub>, (A));  $^{13}\text{C}$  NMR (62.9 MHz,  $CDCl_3$ ,  $25^\circ\text{C}$ ):  $\delta$  = 206.7, 205.7, 170.9, 165.4, 160.4, 138.0, 135.3, 133.7,

S10

129.3, 128.5, 128.3, 128.2, 127.5, 112.7, 112.3, 103.0, 75.2, 72.4, 51.8, 51.0, 49.2, 48.5, 36.8, 35.6, 33.4, 32.4, 31.8, 29.7, 23.1, 21.0, 20.6, 18.3.

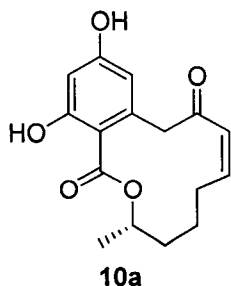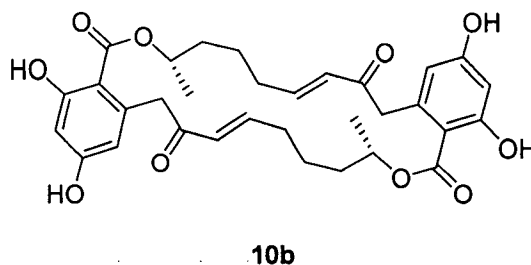

**cis-Resorcyllide (10a) and dimmer (10b):** To a refluxing (80 °C) solution of diene **6** (26 mg, 0.0817 mmol) in CCl<sub>3</sub>CH<sub>3</sub> (150 mL, dilution 0.54 mM), catalyst **I** (2.2 mg, 0.24 μmol) was added under argon. The reaction was quenched after 1 h by addition of ethylvinyl ether (100 μL) and concentrated under reduced pressure. The crude product was purified by flash column chromatography (SiO<sub>2</sub>, Hexane / AcOEt 8:2) to afford **10a** (9.5 mg, 40%) and **10b** (6.9 mg, 29%) as white solids.

**10a:**  $R_f$  = 0.35 (Hexanes / AcOEt 6:4);  $[\alpha]_D^{25} = +2.7$  ( $c = 0.26$  in MeOH); FTIR (KBr):  $\tilde{\nu} = 3390, 2988, 2967, 2927, 2862, 1679, 1645, 1604, 1446, 1398, 1314, 1267, 1161, 1104, 1052, 850, 815, 790, 736$  cm<sup>-1</sup>; <sup>1</sup>H NMR (250 MHz, CD<sub>3</sub>OD, 25 °C):  $\delta = 6.50$  (dt,  $J = 11.8, 1.5$  Hz, 1H; C(=O)CH=), 6.25 (d,  $J = 2.5$  Hz, 1H; ArH), 6.16 (d,  $J = 2.5$  Hz, 1H; ArH), 5.81 (ddd,  $J = 11.8, 9.9, 5.7$  Hz, 1H; =CHCH<sub>2</sub>), 5.09 – 4.96 (m, 1H; CHCH<sub>3</sub>), 4.57 (d,  $J = 18.5$  Hz, 1H; CHHC(=O)), 3.65 (d,  $J = 18.5$  Hz, 1H; CHHC(=O)), 2.62 – 2.41 (m, 1H; CH<sub>2</sub>CH=CH<sub>2</sub>), 2.30 – 2.14 (m, 1H; CH<sub>2</sub>CH=CH<sub>2</sub>), 1.94 – 1.77 (m, 1H; CH(-CH<sub>3</sub>)CH<sub>2</sub>CHH), 1.75 – 1.57 (m, 3H; CH(-CH<sub>3</sub>)CH<sub>2</sub>CHH), 1.28 (d,  $J = 6.1$  Hz, 3H; CH<sub>3</sub>); <sup>1</sup>H NMR (500 MHz, (CD<sub>3</sub>)<sub>2</sub>CO, 25 °C):  $\delta = 12.01$  (s, 1H; OH), 9.25 (br s, 1H; OH), 6.50 (dt,  $J = 11.9, 1.4$  Hz, 1H; C(=O)CH=), 6.32 (d,  $J = 2.3$  Hz, 1H; ArH), 6.25 (d,  $J = 2.3$  Hz, 1H; ArH), 5.77 (ddd,  $J = 11.9, 10.1, 6.0$  Hz, 1H; =CHCH<sub>2</sub>), 5.05 – 4.97 (m, 1H; CHCH<sub>3</sub>), 4.58 (d,  $J = 18.3$  Hz, 1H; CHHC(=O)), 3.69 (d,  $J = 18.3$  Hz, 1H; CHHC(=O)), 2.58 – 2.47 (m, 1H; CHHCH=CH<sub>2</sub>), 2.20 – 2.12 (m, 1H;

S11

CHHCH=CH<sub>2</sub>), 1.93 – 1.82 (m, 1H; CH(-CH<sub>3</sub>)CH<sub>2</sub>CHH), 1.72 – 1.61 (m, 3H; CH(-CH<sub>3</sub>)CH<sub>2</sub>CHH), 1.28 (d, *J* = 6.0 Hz, 3H; CH<sub>3</sub>); <sup>13</sup>C NMR (62.9 MHz, CD<sub>3</sub>OD, 25 °C): δ = 204.7, 172.8, 167.1, 164.1, 140.1, 139.9, 132.8, 114.0, 106.2, 103.0, 76.9, 51.5, 32.2, 27.6, 26.4, 21.5; HRMS (MALDI – FTMS) calcd for C<sub>16</sub>H<sub>18</sub>O<sub>5</sub> ([M+H]<sup>+</sup>): 291.1227; found 291.1231.

**10b**: <sup>1</sup>H NMR (500 MHz, (CD<sub>3</sub>)<sub>2</sub>CO, 25 °C): δ = 11.95 (s, 2H; OH), 9.22 (br s, 2H; OH), 7.05 – 6.93 (m, 2H; =CHCH<sub>2</sub>), 6.34 – 6.23 (m, 6H; ArH, C(=O)CH=), 5.33 – 5.23 (m, 2H; OCH(-CH<sub>3</sub>)CH<sub>2</sub>), 4.23 (AB<sub>q</sub>, *J* = 17.9 Hz, 4H; CH<sub>2</sub>C(=O)), 2.44 – 2.33 (m, 2H; CH<sub>2</sub>CH=CH<sub>2</sub>), 2.33 – 2.22 (m, 2H; CH<sub>2</sub>CH=CH<sub>2</sub>) 1.74 – 1.51 (m, 8H; CH<sub>2</sub>CH<sub>2</sub>), 1.27 (d, *J* = 6.4 Hz, 6H; CH<sub>3</sub>); HRMS (ESI pos.) calcd for C<sub>32</sub>H<sub>36</sub>O<sub>10</sub> ([M+H]<sup>+</sup>): 581.2387; found 581.2377.

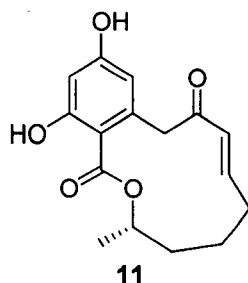

**trans-Resorcyllide (11)**: To a stirred solution of selenide **9** (4.2 mg, 0.0034 mmol) and AcOH (0.5 μL) in THF (1.5 mL), an aqueous solution of H<sub>2</sub>O<sub>2</sub> (30%; 2.7 μL, 0.0237 mmol) diluted in additional H<sub>2</sub>O (0.5 mL), was added drop-wise at 0 °C. After 1 h the reaction mixture was quenched with saturated NaHCO<sub>3</sub> (50 μL), extracted with Et<sub>2</sub>O (2 x 1.5 mL) and the combined organic layers were washed with water (0.5 mL) and brine (0.5 mL), dried over anhydrous Na<sub>2</sub>SO<sub>4</sub> and concentrated under reduced pressure. The crude product was purified by flash column chromatography (SiO<sub>2</sub>, Hexane / AcOEt 75:25) to afford **11** as colorless solid (2.4 mg, 90%).

*R*<sub>f</sub> = 0.24 (Hexanes / AcOEt 6:4); [*α*]<sub>D</sub><sup>25</sup> = + 46.9 (*c* = 0.66 in MeOH); FTIR (KBr):  $\tilde{\nu}$  = 3445, 2961, 2930, 2860, 1704, 1651, 1627, 1455, 1267, 1171, 846, 681, 544 cm<sup>-1</sup>; <sup>1</sup>H NMR (250 MHz, CD<sub>3</sub>OD, 25 °C): δ = 6.95 (ddd, *J* = 16.0, 8.4, 6.1 Hz, 1H;

S12

=CHCH<sub>2</sub>), 6.31 (d, *J* = 2.3 Hz, 1H; ArH), 6.22 (d, *J* = 2.3 Hz; 1H, ArH), 5.94 (dt, *J* = 16.0, 1.1 Hz, 1H; C(=O)CH=), 5.19 – 5.07 (m, 1H; CHCH<sub>3</sub>), 4.43 (d, *J* = 12.6 Hz, 1H; CHHC(=O)), 3.32 (d, *J* = 12.6 Hz, 1H; CHHC(=O)), 2.36 – 2.22 (m, 2H; CH<sub>2</sub>CH=CH<sub>2</sub>), 1.99 – 1.60 (m, 4H; CH<sub>2</sub>CH<sub>2</sub>), 1.35 (d, *J* = 6.1 Hz, 3H; CH<sub>3</sub>); <sup>1</sup>H NMR (500 MHz, (CD<sub>3</sub>)<sub>2</sub>CO, 25 °C): δ = 9.19 (br s, 1H; OH), 8.80 (br s, 1H; OH), 6.90 (ddd, *J* = 16.0, 8.2, 6.0 Hz, 1H; =CHCH<sub>2</sub>), 6.42 (d, *J* = 2.3 Hz, 1H; ArH), 6.36 (d, *J* = 2.3 Hz; 1H, ArH), 5.93 (dt, *J* = 16.5, 1.4 Hz, 1H; C(=O)CH=), 5.24 – 5.15 (m, 1H; CHCH<sub>3</sub>), 4.31 (d, *J* = 12.8 Hz, 1H; CHHC(=O)), 3.51 (d, *J* = 12.8 Hz, 1H; CHHC(=O)), 2.36 – 2.21 (m, 2H; CH<sub>2</sub>CH=CH<sub>2</sub>), 2.01 – 1.95 (m, 1H; CH(-CH<sub>3</sub>)CH<sub>2</sub>CHH), 1.88 – 1.75 (m, 2H; CH(-CH<sub>3</sub>)CHHCHH), 1.75 – 1.64 (m, 1H; CH(-CH<sub>3</sub>)CHHCH<sub>2</sub>), 1.36 (d, *J* = 6.4 Hz, 3H; CH<sub>3</sub>); <sup>13</sup>C NMR (62.9 MHz, CD<sub>3</sub>OD, 25 °C): δ = 201.8, 171.1, 161.1, 158.9, 152.1, 136.4, 131.3, 114.8, 110.4, 102.6, 73.7, 44.2, 35.0, 32.6, 25.5, 20.7; HRMS (ESI pos.) calcd for C<sub>16</sub>H<sub>18</sub>O<sub>5</sub> ([M+H]<sup>+</sup>): 291.1227; found 291.1227.
